# Supplementary material
Source: HighWire-hosted journal article supplement (http://cmajopen.ca/highwire/filestream/81335/field_highwire_adjunct_files/2/2019-0198-original-submission.pdf)
Supplement: 2019-0198-original-submission.pdf [file 2019-0198-original-submission.pdf]

Emergency department use by patients with cancer receiving chemotherapy in Ontario, Canada:  
A population based cohort study

Keerat Grewal, MD, MSc;<sup>1,2,3</sup> Monika K. Krzyzanowska, MD, MPH;<sup>2,4,5</sup> Shelley McLeod,  
MSc;<sup>1,6</sup> Bjug Borgundvaag, MD, PhD;<sup>1,6</sup> Clare L. Atzema, MD, MSc<sup>2,3,7</sup>

<sup>1</sup>Schwartz/Reisman Emergency Medicine Institute, Sinai Health System, Toronto, Ontario,  
Canada

<sup>2</sup>ICES, Toronto, Ontario, Canada

<sup>3</sup>Division of Emergency Medicine, Department of Medicine, University of Toronto, Toronto,  
Ontario, Canada

<sup>4</sup>Division of Medical Oncology, Department of Medicine, University of Toronto, Toronto,  
Ontario, Canada

<sup>5</sup>Division of Medical Oncology & Hematology, University Health Network, Toronto, Ontario,  
Canada

<sup>6</sup>Department of Family & Community Medicine, University of Toronto, Toronto, Ontario,  
Canada

<sup>7</sup>Department of Emergency Services, Sunnybrook Health Sciences Centre, Toronto, Ontario,  
Canada

Corresponding Author:

Keerat Grewal, MD, MSc

Schwartz/Reisman Emergency Medicine Institute

Sinai Health System

206-600 University Avenue

Toronto, ON M5T3L9

Keerat.grewal@sinaihealthsystem.ca

T 416-586-4800 x 5959

F 416-586-3111

Word Count: 2,411

Figures: 2

Tables: 5

Key Words: emergency medicine, oncology, health services

Running Head: Emergency department use by patients with cancer

**Abstract:**

Introduction: Patients with cancer frequently require emergency medical care during treatment. The objective of this study was to characterize emergency department (ED) visits made by cancer patients receiving chemotherapy and to describe associated outcomes.

Methods: This retrospective cohort study used population-based administrative data from Ontario, Canada. Patients 18 years and older with a cancer diagnosis who received chemotherapy in the 30 days prior to being seen in an ED between 2013 and 2017 were included. ED discharge diagnosis codes were categorized in order to identify the most frequent ED diagnoses. We examined the proportion of patients admitted to hospital, ED length-of-stay, and 30-day mortality. We used logistic regression to identify predictors of hospital admission.

Results: We identified 218,459 ED visits made by 87,555 patients. The median (interquartile range [IQR]) number of ED visits per patient was 2 (1, 3). Hematological, gastrointestinal, breast, and lung cancer were the most common malignancies represented. The most common ED diagnoses were infection/fever (57,036 [26.1%]) and gastrointestinal diagnoses (26,456 [12.1%]). Of all visits, 77,978 (35.7%) resulted in admission to hospital. Median (IQR) ED length of stay was 5.3 (2.3, 6.0) hours. Thirty-day mortality after an ED visit was 9.8%. There was an increased odds of admission among patients who previously received palliative consultation, patients with a bone/soft tissue or hematological malignancies, and those with infection, GI, pulmonary, cardiac, weakness or GU/nephrology diagnoses.

Interpretation: Patients with cancer frequently use the ED during chemotherapy. We found that one in four ED visits were due to infection/fever and approximately 35% of ED visits resulted in hospital admission. These results highlight opportunities to optimize care for certain patients being actively treated for cancer, particularly around infectious complaints.

Words: 280

## Introduction:

It is estimated that half of all Canadians will develop cancer during their lifetime,<sup>1</sup> and cancer is the leading cause of death in Canada.<sup>2</sup> Although advances in treatments such as chemotherapy and radiation have improved survival among many patients with cancer, these treatments are not without significant adverse effects and toxicities.<sup>3</sup> Given these issues, it is not surprising that patients undergoing active cancer treatment are frequent users of the emergency department (ED).<sup>4-6</sup>

A recent study from the United States (U.S.) using the Nationwide Emergency Department Sample estimated that patients with cancer account for approximately 4% of all ED visits in the U.S.<sup>7</sup> Another U.S. report that examined health insurance claims found that patients with cancer who were undergoing systemic therapy were seen in the ED an average of twice per year.<sup>6</sup> In Canada, the Cancer Quality Council of Ontario reported that over 40% of patients with colon or breast cancer who receive adjuvant chemotherapy are seen in the ED at least once within four weeks of chemotherapy.<sup>8</sup> Approximately 20% of these patients are admitted to hospital from the ED visit. Six percent of these patients will be seen in the ED five or more times during active treatment.

Previous studies have shown that fever, gastrointestinal complaints and pain are common reasons patients with cancer are seen in the ED and/or admitted to hospital.<sup>9-11</sup> The objective of this study was to describe on a population-based level why adult patients with cancer receiving chemotherapy are seen in the ED in Ontario, Canada, and to describe the outcomes associated with these ED visits.

## Methods:

1  
2  
3 We conducted a retrospective cohort study of population-based health data from Ontario,  
4  
5 Canada. This study received privacy approval from ICES and ethics approval from the Research  
6  
7 Ethics Board at Sinai Health System.  
8  
9

### 10 11 12 *Data Sources* 13

14  
15 Study patients and related information were obtained from province-wide health  
16  
17 administrative databases held at ICES. See the *Appendix* for a description of the databases used  
18  
19 for this study. These datasets were linked using encoded identifiers and analyzed at ICES.  
20  
21 Ontario has universal health care coverage for medically-necessary care, therefore, these  
22  
23 databases contain the large majority of healthcare utilization in the province.  
24  
25  
26  
27

### 28 29 *Study Participants* 30

31  
32 Adult patients aged 18 years and older with a cancer diagnosis were identified from the  
33  
34 Ontario Cancer Registry if they had a valid Ontario Health Insurance Plan (OHIP) health card  
35  
36 number. We then identified patients who received chemotherapy from the Activity Level  
37  
38 Reporting Database, New Drug Funding Database, and the Ontario Health Insurance Plan  
39  
40 database in the 30 days prior to an ED visit between January 1, 2013 and June 30, 2017. All ED  
41  
42 visits (whether cancer-related or not) within 30 days of chemotherapy were included. We  
43  
44 identified ED visits from the Canadian Institute for Health Information's National Ambulatory  
45  
46 Care Reporting System. See the *Appendix* for further description of codes used to identify  
47  
48 patients receiving chemotherapy.  
49  
50

51  
52 We excluded visits in an Ontario ED that was not open 24 hours per day or visits to an  
53  
54 urgent care centre (n=5,538), visits that resulted in the patient leaving the ED without being seen  
55  
56  
57  
58  
59  
60

1  
2  
3 by a healthcare provider or leaving against medical advice (n=1,149), and visits with missing ED  
4  
5 diagnoses (n=19). We also excluded ED visits where the main diagnosis for the ED visit was  
6  
7 listed as radiation or chemotherapy (n=3,569).  
8  
9

### 10 11 12 *Outcome Variables*

13  
14  
15 The primary outcome of interest was the ED diagnosis. We classified the primary ED  
16  
17 diagnoses into general categories based on the *International Classification of Diseases – 10<sup>th</sup>*  
18  
19 *Edition* (ICD-10) codes. If the primary ED diagnosis was a broad ‘cancer’ diagnosis, the second  
20  
21 and third ED diagnosis and chief complaint were assessed to ascertain the reason for the ED  
22  
23 visit. If we were still unable to determine a main ED diagnosis by this method, the diagnosis was  
24  
25 left as ‘cancer’. We identified over 30 categories of diagnoses. These categories included  
26  
27 infection/fever (i.e., sepsis, pneumonia, urinary tract infections, cellulitis, fever, neutropenia,  
28  
29 etc.); gastrointestinal diagnoses (i.e., varices, ulcers, GI bleed, obstruction, etc.), pain (abdominal  
30  
31 pain, headache, any pain-related diagnosis); hematological diagnoses (i.e., anemias,  
32  
33 thrombocytopenias, etc.); pulmonary diagnoses (i.e., dyspnea, pulmonary hypertension, COPD,  
34  
35 pleural effusion, etc.); thrombosis; etc. See the *Appendix, Table 1* for categorization of ICD-10  
36  
37 codes.  
38  
39  
40  
41

42  
43 Secondary outcomes included 1) proportion of ED visits resulting in admission to  
44  
45 hospital; 2) median ED length-of-stay, defined as time from ED registration to the time the  
46  
47 patient physically left the ED; 4) 30-day mortality after an ED visit; and 6) factors associated  
48  
49 with hospital admission.  
50  
51

### 52 53 54 *Covariates*

1  
2  
3 To identify factors associated with hospital admission, the following covariates were  
4 included in the multivariable model: demographics (age, sex, income quintile), cancer-related  
5 variables (cancer type categorized based on ICD-O codes, radiation in the 90 days prior to ED  
6 visit), receipt of palliative consultation prior to the ED visit, ED visit characteristics (ambulance  
7 arrival, triage acuity [based on the Canadian Triage and Acuity Scale [CTAS]], time of ED visit  
8 [day, evening or night], day of ED visit [weekday or weekend], ED diagnosis [ED visits without  
9 any of the top 10 diagnoses was used as the reference category], and hospital type [small,  
10 community, academic]). See the *Appendix* for further description and definitions of covariates.  
11  
12  
13  
14  
15  
16  
17  
18  
19  
20  
21  
22  
23

#### 24 *Statistical Analysis*

25  
26 The total number of ED visits by unique patients during the study period was determined.  
27 Descriptive statistics were used to characterize unique patients based on their first ED encounter.  
28 Characteristics of all ED visits were then described using frequencies and percentages for  
29 categorical data and medians and interquartile ranges (IQR) for non-normally distributed  
30 continuous variables. ED visits resulting in admission versus discharge were then described,  
31 removing patients who died in the ED. Proportional differences were estimated using chi-square  
32 statistics with 95% confidence intervals (CIs).  
33  
34  
35  
36  
37  
38  
39  
40  
41

42 To examine the adjusted association of the above-listed covariates with admission to  
43 hospital, we conducted a multivariable logistic regression model using generalized estimating  
44 equations with an exchangeable correlation structure to account for clustering at the patient level  
45 due to repeat visits. The correlation coefficient with the outcome was assessed to determine the  
46 effect of clustering. The unadjusted and adjusted odds ratios (OR) with 95% CIs were calculated.  
47  
48  
49  
50  
51  
52  
53  
54 All analyses were conducted using SAS 9.3 (SAS, North Carolina).  
55  
56  
57  
58  
59  
60

**Results:**

There were 87,555 unique patients who made 218,459 ED visits within 30 days of receiving chemotherapy during the study period. See Figure 1 for a study flow diagram. Table 1 contains the baseline characteristics of the cohort. The median (IQR) age of patients was 66 (56, 74) years and the median (IQR) number of ED visits per patient was 2 (1, 3).

The most common ED diagnosis was infection/fever (57,036 [26.1%] ED visits). In the infectious/fever diagnostic category, the most common diagnoses included fever not yet diagnosed, neutropenia, lower respiratory tract infections, genitourinary infections and skin/soft tissue infections. The next most frequent ED diagnoses were gastrointestinal (26,456 [12.1%]), and pain-related diagnoses (22,135 [10.1%]). See Table 2 and Figure 2 for top 10 ED diagnoses.

Over half of ED visits occurred during daytime hours (8:00-16:59). Over 40% of ED visits had a specialty consultation in the ED (93,098, [42.6%]), and 77,978 (35.7%) ED visits resulted in hospital admission. The overall median (IQR) ED length of stay was 5.3 (3.0, 9.8) hours. For patients discharged from the ED, median (IQR) ED length of stay was 3.9 (2.3, 6.0) hours, compared to 11.3 (6.6, 21.0) hours for admitted patients. Thirty-day mortality after an ED visit was 9.8%.

ED visits by patients with hematological malignancies (47,207 visits) were the most common, followed by gastrointestinal cancers (45,626 visits), breast cancer (38,914 visits) and lung cancer (27,710 visits). Infection/fever was the most common ED diagnosis for all cancers. See Table 3 for the top three ED diagnoses for hematological, gastrointestinal, breast and lung cancers. Patients with bone/soft tissue cancer had the highest (41.1%) proportion of admissions; whereas patients with breast cancer had the lowest (27.4%) admission rate.

1  
2  
3 Six-hundred and forty-eight (0.3%) patients died in the ED, leaving 217,811 ED visits for  
4  
5 analysis of predictors of admission. Comparison of the characteristics of ED visits resulting in  
6  
7 admission versus discharge for these patients are presented in Table 4. In the adjusted analysis,  
8  
9 ED visits with a diagnosis of infection/fever, GI diagnoses, pulmonary diagnoses, cardiac  
10  
11 diagnoses, weakness, or GU/nephrology diagnoses had an increased odds of hospital admission  
12  
13 compared to those without one of the top 10 main diagnoses (Table 5). Conversely, those with a  
14  
15 final diagnosis of pain or a device problem were significantly less likely to be admitted. ED  
16  
17 visits made by patients over the age of 65, patients who had received radiation, and those who  
18  
19 had received palliative care were more likely to be admitted ED visits at a community or  
20  
21 academic hospital had an increased odds of admission compared to smaller hospital sites.  
22  
23  
24 Compared to patients with gastrointestinal cancer, patients with bone/soft tissue and  
25  
26 hematological malignancies had an increased odds of admission, whereas those with  
27  
28 gynecological, head and neck and breast cancer were less likely to be admitted to hospital.  
29  
30  
31  
32  
33  
34

### 35 **Interpretation:**

36  
37  
38 In this study, there were over 200,000 ED visits made in the province of Ontario by  
39  
40 cancer patients receiving chemotherapy over 4.5 years. Over a third resulted in hospital  
41  
42 admission. By comparison, in the general population the rate of hospital admission in Ontario in  
43  
44 the 2017/2018 fiscal year was 12%.<sup>12</sup> The three-times higher rate of admission for patients with  
45  
46 cancer in our study is consistent with previous literature that has shown that the proportion of ED  
47  
48 visits resulting in hospital admission among patients with cancer is significantly higher than the  
49  
50 general population.<sup>13</sup> The rate of hospital admission found in our study was lower than studies  
51  
52 from the U.S., which have reported 50% to 90% of ED visits among patients with active cancer  
53  
54  
55  
56  
57  
58  
59  
60



1  
2  
3 result in hospital admission.<sup>7,14,15</sup> Two of these U.S. studies examined ED visits that were  
4 cancer-related<sup>7</sup> or treatment-related,<sup>14</sup> whereas we examined all-cause ED visits by cancer  
5 patients. The different type of ED visits examined in the studies may account for some of the  
6 disparity in the admission rates. This variability may also be related to different healthcare  
7 systems between the two countries: higher rates of hospital admission have been shown for other  
8 diseases in the U.S. versus comparable countries.<sup>16</sup>  
9

10  
11 We found that one in four (26.1%) ED visits were due to infection or fever, and it  
12 remained the most common ED diagnosis across all types of cancers. This finding is in keeping  
13 with previous literature, which has shown that infection, fever, and febrile neutropenia are  
14 among the most frequent reasons for ED use among cancer patients.<sup>7,9-11,14,17</sup> We also found that  
15 45.7% of ED visits related to infection or fever resulted in hospital admission, and  
16 infection/fever had the highest odds of hospital admission, which is consistent with previous  
17 studies.<sup>7,14</sup> There is increasing interest in the area of potentially preventable ED visits among  
18 patients with cancer,<sup>18,19</sup> and the high number of ED visits for infection/fever highlights the need  
19 for validated risk stratification tools for cancer patients to determine which febrile patients  
20 require an ED visit. Future work should focus on determining which patients with fever can  
21 safely avoid an ED visit (e.g., patients with non-systemic infections such as a cellulitis or otitis  
22 media) and the best non-ED setting to be safely worked-up and treated.  
23  
24  
25  
26  
27  
28  
29  
30  
31  
32  
33  
34  
35  
36  
37  
38  
39  
40  
41  
42  
43

44  
45 Gastrointestinal diagnoses and ED visits for pain were also common in the cohort, each  
46 accounting for more than 10% of all ED visits. While over 40% of gastrointestinal diagnoses  
47 resulted in hospital admission, only 20% of visits for pain resulted in admission to hospital. ED  
48 visits with pain-related diagnoses had a lower odds of hospital admission compared to those  
49 without any of the top 10 diagnoses. The low number of admissions for ED visits associated with  
50  
51  
52  
53  
54  
55  
56  
57  
58  
59  
60

1  
2  
3 pain is promising; health care practitioners are able to offer acceptable outpatient management  
4  
5 for pain-related ED visits in order to avoid hospital admission. However, based on the high  
6  
7 number of ED visits related to pain, it is important to understand why cancer patients with pain  
8  
9 require the ED services in the first place. Increased access to palliative care for pain control and  
10  
11 discussions surrounding pain control with the patient's primary care physician or specialist may  
12  
13 reduce ED visits related to pain.  
14  
15

16  
17 We found that over half of ED visits occurred during daytime hours. During daytime  
18  
19 hours, cancer centres are typically open and may be able to see patients on an urgent basis  
20  
21 through an urgent care clinic. This would allow for continuity of care in a setting where the  
22  
23 patient and their course of illness is known to providers. Furthermore, some patients may be  
24  
25 better treated in an urgent care clinic setting, where they may avoid wait times and potential  
26  
27 exposure to infectious pathogens commonly encountered in the ED. The number of ED visits  
28  
29 during daytime hours highlights an important opportunity for future research to examine the  
30  
31 availability and outcomes associated with urgent care clinic use by cancer patients.  
32  
33  
34  
35  
36  
37

### 38 *Limitations*

39  
40 There are several limitations of this study. We examined a heterogeneous group of  
41  
42 patients with various cancers who were receiving different treatment regimens. Future studies are  
43  
44 needed to determine whether our findings are specific to certain treatment regimens.  
45  
46

47 Additionally, this study used administrative data and there may be potential misclassification  
48  
49 bias if there were coding errors for the variables used in this study, including the main diagnosis.  
50  
51 However, many studies have previously used these databases and found good agreement  
52  
53  
54  
55  
56  
57  
58  
59  
60

1  
2  
3 between chart reviews and the databases for mandatory variables<sup>21</sup> and the main ED diagnosis  
4  
5 for various diseases.<sup>22-24</sup>  
6

7  
8 In smaller communities, patients may receive scheduled treatment in the ED; therefore,  
9  
10 the ED visit captured in this study may not have been an unexpected visit or a true emergency  
11  
12 visit. We tried to mitigate this potential bias by excluding patients with the main diagnosis of  
13  
14 chemotherapy or radiation therapy. Finally, we examined *all* ED visits within 30-days of  
15  
16 chemotherapy. It was expected the majority of the included ED visits were related to cancer or  
17  
18 treatment side effects, however, some of the ED visits captured in this study may not be due to  
19  
20 the cancer or treatment itself. It is known that patients with cancer make far more ED visits than  
21  
22 age-matched controls,<sup>13</sup> therefore, it is expected that the majority of ED visits were related to  
23  
24 cancer or treatment.  
25  
26  
27  
28  
29  
30

### 31 **Conclusions:**

32  
33 Patients with cancer frequently use the ED while undergoing chemotherapy. We found  
34  
35 that one in four ED visits were due to infection/fever and approximately 35% of ED visits  
36  
37 resulted in hospital admission. The results of this study highlight opportunities for future  
38  
39 research, including the identification of high-yield groups and diagnoses to target for future care  
40  
41 interventions.  
42  
43  
44  
45  
46  
47  
48  
49  
50  
51  
52  
53  
54  
55  
56  
57  
58  
59  
60

**Acknowledgements:**

*This study was supported by ICES, which is funded by an annual grant from the Ontario Ministry of Health and Long-Term Care (MOHLTC). Parts of this material are based on data and information compiled and provided by MOHLTC, CIHI and CCO. The analyses, conclusions, opinions and statements expressed herein are solely those of the authors and do not reflect those of the funding or data sources; no endorsement is intended or should be inferred.*

**Contributors:**

All authors contributed to study conception and design, and the acquisition, analysis, or interpretation of data. Keerat Grewal and Clare Atzema drafted the manuscript. All authors contributed to editing and revising the manuscript. Keerat Grewal had full access to all the data in the study and performed the statistical analysis. Clare Atzema supervised the study. All authors gave final approval of the version to be published and agreed to be accountable for all aspects of the work.

Confidential

## References:

1. Canadian Cancer Statistics Advisory Committee. Canadian Cancer Statistics 2018. Toronto, On: Canadian Cancer Society, 2018. Available at: [www.cancer.ca/Canadian-Cancer-Statistics-2018-EN](http://www.cancer.ca/Canadian-Cancer-Statistics-2018-EN). Accessed July 23, 2019.07.2
2. Statistics Canada. Leading causes of death, by sex. Available at: <http://www.statcan.gc.ca/tables-tableaux/sum-som/l01/cst01/hlth36a-eng.htm>. Updated 2019. Accessed July 23, 2019.
3. National Cancer Institute. Common toxicity criteria manual. 1999.
4. Mayer DK, Travers D, Wyss A, Leak A, Waller A. Why do patients with cancer visit emergency departments? Results of a 2008 population study in North Carolina. *J Clin Oncol*. 2011;29(19):2683-8.
5. Brown J, Grudzen C, Kyriacou DN, et al. The emergency care of patients with cancer: Setting the research agenda. *Ann Emerg Med*. 2016;68(6):706-11.
6. Millman Fitch K, Pysenson B. Cancer patients receiving chemotherapy: Opportunities for better management. New York, New York: US Oncology; 2010.
7. Rivera DR, Gallicchio L, Brown J, Liu B, Kyriacou DN, Shelburne N. Trends in adult cancer-related emergency department utilization: An analysis of data from the Nationwide Emergency Department Sample. *JAMA Oncol*. 2017;3(10):e172450.
8. Cancer Quality Council of Ontario. Unplanned visits to hospital after adjuvant chemotherapy. Available at: [http://www.csqi.on.ca/by\\_patient\\_journey/treatment/unplanned\\_hospital\\_visits\\_during\\_chemotherapy/](http://www.csqi.on.ca/by_patient_journey/treatment/unplanned_hospital_visits_during_chemotherapy/). Updated 2015. Accessed July 19, 2019.
9. Pittman NM, Hopman WM, Mates M. Emergency room visits and hospital admission rates after curative chemotherapy for breast cancer. *J Oncol Pract*. 2015;11(2):120-5.
10. Vandyk AD, Harrison MB, Macartney G, Ross-White A, Stacey D. Emergency department visits for symptoms experienced by oncology patients: A systematic review. *Support Care Cancer*. 2012;20(8):1589-99.
11. McKenzie H, Hayes L, White K, et al. Chemotherapy outpatients' unplanned presentations to hospital: A retrospective study. *Support Care Cancer*. 2011;19(7):963-9.
12. Canadian Institute for Health Information. Emergency department visits: Volumes and median length of stay by triage level, visit disposition, and main problem. Available at: [https://apps.cihi.ca/mstrapp/asp/Main.aspx?server=apmstrestprd\\_i.cihi.ca&project=Quick%20Stats&uid=pce\\_pub\\_en&pwd=&evt=2048001&visualizationMode=0&documentID=5C3D461F11E8D6F520190080EFE53D3B&hiddensections=header%2Cpath%2CdockTop%2Cdo](https://apps.cihi.ca/mstrapp/asp/Main.aspx?server=apmstrestprd_i.cihi.ca&project=Quick%20Stats&uid=pce_pub_en&pwd=&evt=2048001&visualizationMode=0&documentID=5C3D461F11E8D6F520190080EFE53D3B&hiddensections=header%2Cpath%2CdockTop%2Cdo)

1  
2  
3 [ckLeft%2Cfooter&\\_ga=2.13520311.1082733106.1562869000-156282843.1531919253.](#)  
4 Accessed July 19, 2019.  
5

- 6  
7 13. Enright K, Grunfeld E, Yun L, et al. Population-based assessment of emergency room visits  
8 and hospitalizations among women receiving adjuvant chemotherapy for early breast cancer.  
9 *J Oncol Pract.* 2015;11(2):126-32.  
10  
11 14. Jairam V, Lee V, Park HS, et al. Treatment-related complications of systemic therapy and  
12 radiotherapy. *JAMA Oncol.* 2019; E-pub ahead of print.  
13  
14 15. Caterino JM, Adler D, Durham DD, et al. Analysis of diagnoses, symptoms, medications,  
15 and admissions among patients with cancer presenting to emergency departments. *JAMA*  
16 *Network Open;* 2019;2(3):e190979.  
17  
18 16. Sawyer B, McDermott. How does the quality of the U.S. healthcare system compare to other  
19 countries? Available at: [https://www.healthsystemtracker.org/chart-collection/quality-u-s-](https://www.healthsystemtracker.org/chart-collection/quality-u-s-healthcare-system-compare-countries/#item-start)  
20 [healthcare-system-compare-countries/#item-start](https://www.healthsystemtracker.org/chart-collection/quality-u-s-healthcare-system-compare-countries/#item-start). Accessed July 26, 2019.  
21  
22 17. Baena-Canada JM, Estalella-Mendoza S, Rosado-Varela P, et al. Use of health-care services  
23 during chemotherapy for breast cancer. *Eur J Cancer.* 2012;48(18):3328-34.  
24  
25 18. Panattoni L, Fedorenko C, Greenwood-Hickman MA, et al. Characterizing potentially  
26 preventable cancer- and chronic disease-related emergency department use in the year after  
27 treatment initiation: A regional study. *J Oncol Pract.* 2018; 14(3):e176-85.  
28  
29 19. Yao J, Green B, Krzyzanowska MK. Identifying potentially preventable emergency  
30 department (PPED) visits among patients with cancer in Ontario. *J Clin Oncol.*  
31 2018;36(30S):25.  
32  
33 20. Barbera L, Taylor C, Dudgeon D. Why do patients with cancer visit the emergency  
34 department near the end of life? *CMAJ,* 2010;182(6):563-8.  
35  
36 21. Canadian Institute for Health Information. CIHI data quality study of Ontario emergency  
37 department visits for fiscal year 2004–2005: Executive summary. Ottawa, ON: CIHI; 2008.  
38  
39 22. Atzema CL, Austin PC, Miller E, Chong AS, Yun L, Dorian P. A population-based  
40 description of atrial fibrillation in the emergency department: 2002-2010. *Ann Emerg*  
41 *Med.*2013;62(6):570-7.  
42  
43 23. Masood S, Austin PC, Atzema CL. A population-based analysis of outcomes in patients with  
44 a primary diagnosis of hypertension in the emergency department. *Ann Emerg Med.*  
45 2016;68(3):258-67.  
46  
47 24. Grewal K, Austin PC, Kapral MK, Lu H, Atzema CL. Missed strokes using computed  
48 tomography imaging in patients with vertigo: Population-based cohort study. *Stroke.*  
49 2015;46(1):108-13.  
50  
51  
52  
53  
54  
55  
56  
57  
58  
59  
60

Figure 1. Study flow diagram

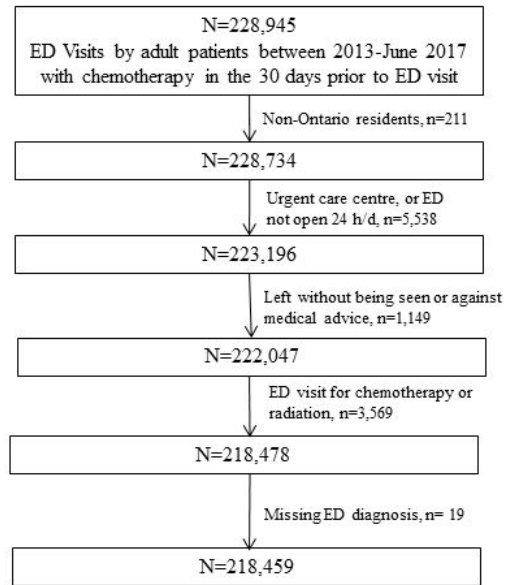

1  
2  
3  
4  
5  
6  
7  
8  
9  
10  
11  
12  
13  
14  
15  
16  
17  
18  
19  
20  
21  
22  
23  
24  
25  
26  
27  
28  
29  
30  
31  
32  
33  
34  
35  
36  
37  
38  
39  
40  
41  
42  
43  
44  
45  
46  
47  
48  
49  
50  
51  
52  
53  
54  
55  
56  
57  
58  
59  
60

Figure 2: Top 10 emergency department diagnoses

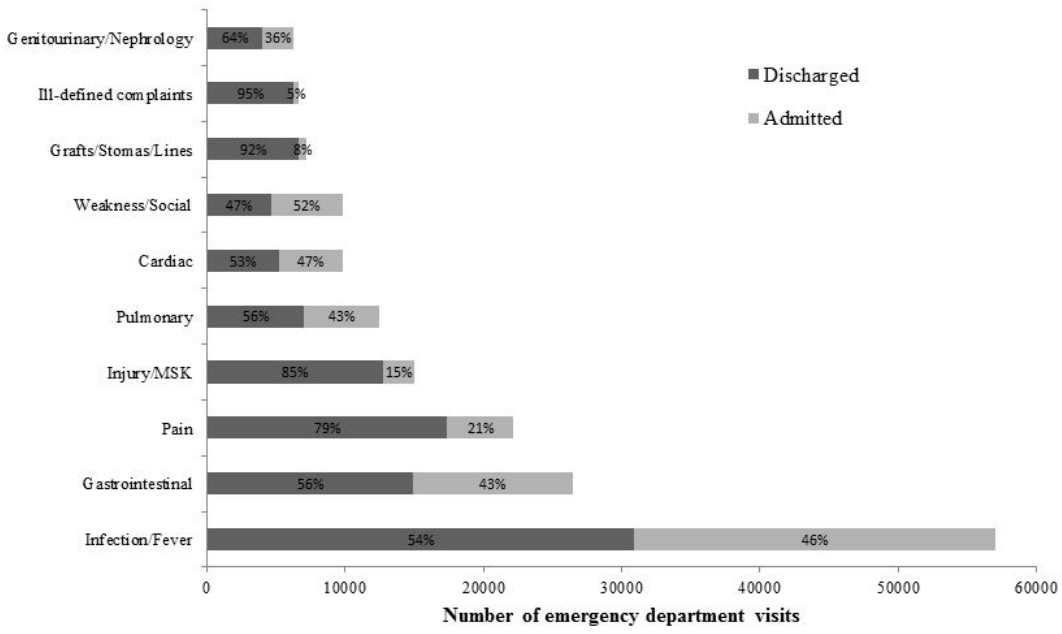



Table 1: Baseline characteristics of unique patients with cancer seen in the emergency department within 30 days of receiving chemotherapy

| Characteristic                                                  | Total number of unique patients<br>n = 87,555 |
|-----------------------------------------------------------------|-----------------------------------------------|
| Median (IQR) age                                                | 66 (56, 74)                                   |
| Median (IQR) number of ED visits within 30 days of chemotherapy | 2 (1, 3)                                      |
| Sex, n (%)                                                      |                                               |
| Female                                                          | 48,172 (55.0)                                 |
| Rural, n (%)                                                    | 13,604 (15.5)                                 |
| Income quintile, n (%)                                          |                                               |
| 1 (highest)                                                     | 15,674 (18.0)                                 |
| 2                                                               | 17,145 (19.7)                                 |
| 3                                                               | 17,543 (20.1)                                 |
| 4                                                               | 18,701 (21.4)                                 |
| 5 (lowest)                                                      | 18,200 (20.9)                                 |
| Cancer type, n (%)                                              |                                               |
| Gastrointestinal                                                | 17,857 (20.4)                                 |
| Breast                                                          | 17,288 (19.8)                                 |
| Hematological                                                   | 16,834 (19.2)                                 |
| Lung                                                            | 11,732 (13.4)                                 |
| Gynecological                                                   | 5,322 (6.1)                                   |
| Male genital                                                    | 4,811 (5.5)                                   |
| Head & neck                                                     | 3,720 (4.3)                                   |
| Genitourinary                                                   | 3,241 (3.7)                                   |
| Neurological                                                    | 2,065 (2.4)                                   |
| Melanoma                                                        | 1,908 (2.2)                                   |
| Bone/soft tissue                                                | 972 (1.1)                                     |
| Endocrine                                                       | 81 (0.1)                                      |
| Other                                                           | 1,706 (2.0)                                   |

IQR = interquartile range; ED = emergency department.

Table 2: Top 10 diagnoses for emergency department visits by patients with cancer seen within 30 days of receiving chemotherapy, N= 218,459 ED visits

| <b>ED diagnosis</b>        | <b>Total number of ED visits<br/>N= 218,459</b> | <b>Hospital Admission<br/>n = 77,978 (35.7%)*</b> | <b>30 day mortality<br/>n=21,333<br/>(9.8%)*</b> |
|----------------------------|-------------------------------------------------|---------------------------------------------------|--------------------------------------------------|
| Infection/fever            | 57,036 (26.1)                                   | 26,060 (45.7)                                     | 3,900 (6.8)                                      |
| Gastrointestinal           | 26,456 (12.1)                                   | 11,490 (43.4)                                     | 2,578 (9.7)                                      |
| Pain                       | 22,135 (10.1)                                   | 4,744 (21.4)                                      | 1,664 (7.5)                                      |
| Injury/MSK†                | 14,971 (6.9)                                    | 2,220 (14.8)                                      | 639 (4.3)                                        |
| Pulmonary                  | 12,492 (5.7)                                    | 5,406 (43.3)                                      | 2,319 (18.6)                                     |
| Cardiac                    | 9,870 (4.5)                                     | 4,613 (46.7)                                      | 923 (9.3)                                        |
| Weakness, social           | 9,814 (4.5)                                     | 5,131 (52.3)                                      | 2,377 (24.2)                                     |
| Device/graft/stoma related | 7,176 (3.3)                                     | 588 (31.7)                                        | 310 (4.3)                                        |
| Ill-defined complaints     | 6,585 (3.0)                                     | 355 (5.4)                                         | 308 (4.7)                                        |
| Genitourinary, nephrology  | 6,280 (2.9)                                     | 2,280 (36.3)                                      | 644 (10.3)                                       |

ED = emergency department; MSK = musculoskeletal

\*Note: percentages in these columns reflect the percent of ED visits for that diagnosis resulting in hospital admission or 30-day mortality

†Includes: fractures, dislocations, injuries (e.g., trauma, lacerations), sprains, strains, etc.

Table 3: Top three emergency department diagnoses for the four most common cancers represented in the cohort

| Diagnosis                                             | Total number of ED visits | Admission to hospital* |
|-------------------------------------------------------|---------------------------|------------------------|
| <b>Hematological cancer</b> (n = 47,207 ED visits)    |                           |                        |
| Infection                                             | 15,460 (32.8)             | 8,101 (52.4)           |
| Injury/MSK                                            | 3,940 (8.4)               | 612 (15.5)             |
| Pain                                                  | 3,901 (8.3)               | 735 (18.8)             |
| <b>Gastrointestinal cancer</b> (n = 45,626 ED visits) |                           |                        |
| Infection                                             | 10,618 (23.3)             | 4,577 (43.1)           |
| Gastrointestinal                                      | 8,822 (19.3)              | 4,516 (51.2)           |
| Pain                                                  | 5,130 (11.2)              | 1,254 (24.4)           |
| <b>Breast cancer</b> (n = 38,914 ED visits)           |                           |                        |
| Infection                                             | 11,158 (28.7)             | 3,931 (35.2)           |
| Pain                                                  | 4,564 (11.7)              | 741 (16.2)             |
| Gastrointestinal                                      | 3,680 (9.5)               | 1,209 (32.9)           |
| <b>Lung cancer</b> (n = 27,710 ED visits)             |                           |                        |
| Infection                                             | 6,551 (23.6)              | 3,357 (51.2)           |
| Pulmonary                                             | 3,298 (11.9)              | 1,690 (51.2)           |
| Gastrointestinal                                      | 2,697 (10.2)              | 951 (35.3)             |

ED = emergency department; MSK = musculoskeletal

\*Note: percentages in this column reflect the percent of ED visits for that diagnosis resulting in hospital admission or 30-day mortality

Table 4: Characteristics of emergency department visits by patients with cancer within 30 days of chemotherapy by discharge versus admission to hospital (N=217,811 ED visits)

| Variable                            | Total ED Visits<br>n = 217,811 | Discharged<br>n = 139,833 | Admitted<br>n = 77,978 | p-value | Difference<br>(95% CI) |
|-------------------------------------|--------------------------------|---------------------------|------------------------|---------|------------------------|
| <b>Demographics</b>                 |                                |                           |                        |         |                        |
| Age ≥65                             | 116,871 (53.7)                 | 72,501 (51.8)             | 44,370 (56.9)          | <0.0001 | 5.1 (4.6-5.5)          |
| Female Sex                          | 117,894 (54.1)                 | 78,071 (55.8)             | 39,823 (51.1)          | <0.0001 | 4.8 (4.3-5.2)          |
| Income quintile                     |                                |                           |                        | 0.44    |                        |
| 1 (highest)                         | 40,935 (18.9)                  | 26,343 (18.8)             | 14,592 (18.7)          |         | 0.1 (-0.2-0.5)         |
| 2                                   | 42,519 (19.5)                  | 27,209 (19.5)             | 15,310 (19.6)          |         | 0.2 (-0.2-0.5)         |
| 3                                   | 43,469 (20.0)                  | 27,883 (19.9)             | 15,586 (20.0)          |         | 0.1 (-0.3-0.4)         |
| 4                                   | 46,048 (21.1)                  | 29,543 (21.1)             | 16,505 (21.2)          |         | 0 (-0.3-0.4)           |
| 5 (lowest)                          | 44,019 (20.2)                  | 28,303 (20.2)             | 15,716 (20.2)          |         | 0.1 (-0.3-0.4)         |
| Missing                             | 821 (0.4)                      | 552 (0.4)                 | 269 (0.3)              |         |                        |
| <b>Cancer Characteristics</b>       |                                |                           |                        |         |                        |
| Palliative Care                     | 110,061 (50.5)                 | 64,368 (46.0)             | 45,693 (58.6)          | <0.0001 | 12.6 (12.1-13.0)       |
| Radiation 90 days prior to ED visit | 31,041 (14.3)                  | 18,375 (13.1)             | 12,666 (16.2)          | <0.0001 | 3.1 (2.8-3.4)          |
| Cancer type                         |                                |                           |                        | <0.0001 |                        |
| Hematological                       | 47,086 (21.6)                  | 29,254 (20.9)             | 17,832 (22.9)          |         | 2.0 (1.6-2.3)          |
| Gastrointestinal                    | 45,467 (20.9)                  | 28,841 (20.6)             | 16,626 (21.3)          |         | 0.7 (0.3- 1.0)         |
| Breast                              | 38,867 (17.9)                  | 28,210 (20.2)             | 10,657 (13.7)          |         | 6.5 (6.2-6.8)          |
| Lung                                | 27,558 (12.7)                  | 16,202 (11.6)             | 11,356 (14.6)          |         | 3.0 (2.7-3.3)          |
| Gynecological                       | 13,806 (6.3)                   | 8,961 (6.4)               | 4,845 (6.2)            |         | 0.2 (0-0.4)            |
| Male genital                        | 12,347 (5.7)                   | 7,948 (5.7)               | 4,399 (5.6)            |         | 0 (-0.2-0.2)           |
| Genitourinary                       | 8,352 (3.8)                    | 5,279 (3.8)               | 3,037 (3.9)            |         | 0.1 (0-0.3)            |
| Head and neck                       | 8,110 (3.7)                    | 5,275 (3.8)               | 2,835 (3.6)            |         | 0.1 (0-0.3)            |
| Neurological                        | 4,826 (2.2)                    | 2,866 (2.0)               | 1,960 (2.5)            |         | 0.5 (0.3-0.6)          |
| Melanoma                            | 4,496 (2.1)                    | 2,821 (2.0)               | 1,675 (2.2)            |         | 0.1 (0.0-0.3)          |
| Bone/soft tissue                    | 2,636 (1.2)                    | 1,550 (1.1)               | 1,086 (1.4)            |         | 0.3 (0.2-0.4)          |
| Endocrine                           | 216 (0.1)                      | 133 (0.1)                 | 83 (0.1)               |         | 0 (0-0)                |
| Other                               | 4,003 (1.8)                    | 2,474 (1.8)               | 1,529 (2.0)            |         | 0.2 (0.1-0.3)          |
| Missing                             | 41 (0.02)                      | 19 (0.0)                  | 22 (0.0)               |         | 0.3                    |
| <b>ED Visit Characteristics</b>     |                                |                           |                        |         |                        |
| Ambulance arrival                   | 54,077 (24.8)                  | 21,649 (15.5)             | 32,428 (41.6)          | <0.0001 | 26.1 (25.7-26.5)       |
| CTAS Triage Acuity                  |                                |                           |                        | <0.0001 |                        |
| 1-2 (highest acuity)                | 91,345 (41.9)                  | 45,260 (32.4)             | 46,085 (59.1)          |         | 26.7 (26.3-27.2)       |
| 3                                   | 97,688 (44.9)                  | 67,776 (48.5)             | 29,912 (38.4)          |         | 10.1 (9.7-10.5)        |
| 4-5 (lowest acuity)                 | 28,341 (13.0)                  | 26,444 (18.9)             | 1,897 (2.4)            |         | 16.5 (16.3-16.7)       |
| Missing                             | 437 (0.2)                      | 353 (0.3)                 | 84 (0.1)               |         |                        |
| Shift                               |                                |                           |                        | <0.0001 |                        |
| Day (8:00-16:59)                    | 124,709 (57.3)                 | 82,721 (59.2)             | 41,988 (53.9)          |         | 5.3 (4.9-5.8)          |
| Evening (17:00-                     | 67,176 (30.8)                  | 41,273 (29.5)             | 25,903 (33.2)          |         |                        |

|                              |                |               |               |                   |                  |
|------------------------------|----------------|---------------|---------------|-------------------|------------------|
| 23:59)                       |                |               |               |                   |                  |
| Night (0:00-7:59)            | 25,926 (11.9)  | 15,839 (11.3) | 10,087 (12.9) |                   | 1.6 (1.3-1.9)    |
| Weekend                      | 60,248 (27.7)  | 39,540 (28.3) | 20,708 (26.6) | <b>&lt;0.0001</b> | 1.7 (1.3-2.1)    |
| Hospital type                |                |               |               | <b>&lt;0.0001</b> |                  |
| Small                        | 18,145 (8.3)   | 14,825 (10.6) | 3,320 (4.3)   |                   | 6.3 (6.1-6.6)    |
| Community                    | 136,384 (62.6) | 90,163 (64.5) | 46,221 (59.3) |                   | 5.2 (4.8-5.6)    |
| Academic                     | 63,240 (29.0)  | 34,829 (24.9) | 28,411 (36.4) |                   | 11.5 (11.1-11.9) |
| Missing                      | 42 (0.0)       | 16 (0.0)      | 26 (0.0)      |                   |                  |
| ED diagnosis                 |                |               |               | <b>&lt;0.0001</b> |                  |
| None of top 10               | 45,233 (20.8)  | 30,142 (21.6) | 15,091 (19.4) |                   | 2.2 (1.9-2.6)    |
| Infection/fever              | 56,994 (26.2)  | 30,934 (22.1) | 26,060 (33.4) |                   | 11.3 (10.9-11.7) |
| Gastrointestinal             | 26,432 (12.1)  | 14,942 (10.7) | 11,490 (14.7) |                   | 4.0 (3.8-4.4)    |
| Pain                         | 22,123 (10.2)  | 17,379 (12.4) | 4,744 (6.1)   |                   | 6.3 (6.1-6.6)    |
| Injury/MSK                   | 14,964 (6.9)   | 12,744 (9.1)  | 2,220 (2.9)   |                   | 6.3 (6.1-6.5)    |
| Pulmonary                    | 12,429 (5.7)   | 7,023 (5.0)   | 5,406 (6.9)   |                   | 1.9 (1.7-2.1)    |
| Cardiac                      | 9,818 (4.5)    | 5,205 (3.7)   | 4,613 (5.9)   |                   | 2.2 (2.0-2.4)    |
| Weakness, social             | 9,783 (4.5)    | 4,652 (3.3)   | 5,131 (6.6)   |                   | 3.3 (3.1-3.5)    |
| Device/graft-related         | 7,175 (3.3)    | 6,587 (4.7)   | 588 (0.8)     |                   | 4.0 (3.8-4.1)    |
| Ill-defined                  | 6,582 (3.0)    | 6,227 (4.5)   | 355 (0.5)     |                   | 4.0 (3.9-4.1)    |
| Genitourinary/<br>nephrology | 6,278 (2.9)    | 3,998 (2.9)   | 2,280 (2.9)   |                   | 0.1 (-0.1-0.2)   |

ED = emergency department; CTAS = Canadian Triage and Acuity Scale; MSK = musculoskeletal

Table 5: Unadjusted and adjusted odds of admission to hospital after ED visit (N = 217,811 ED visits) with generalized estimating equation accounting for patient-level clustering

| Variable                            | Unadjusted OR | 95 % CI   | Adjusted OR | 95% CI           |
|-------------------------------------|---------------|-----------|-------------|------------------|
| Age                                 |               |           |             |                  |
| < 65 years                          | REF           |           | REF         |                  |
| ≥ 65 years                          | 1.27          | 1.25-2.30 | <b>1.14</b> | <b>1.11-1.16</b> |
| Sex                                 |               |           |             |                  |
| Male                                | REF           |           | REF         |                  |
| Female                              | 0.80          | 0.78-0.82 | <b>0.96</b> | <b>0.93-0.98</b> |
| Income quintile                     |               |           |             |                  |
| 1 (highest)                         | REF           |           | REF         |                  |
| 2                                   | 1.03          | 1.00-1.07 | 1.01        | 0.98-1.05        |
| 3                                   | 1.04          | 1.01-1.07 | 0.99        | 0.96-1.03        |
| 4                                   | 1.02          | 0.99-1.05 | 0.99        | 0.95-1.02        |
| 5 (lowest)                          | 1.01          | 0.98-1.04 | <b>0.95</b> | <b>0.92-0.99</b> |
| Palliative Care                     | 1.73          | 1.69-1.76 | <b>1.48</b> | <b>1.44-1.51</b> |
| Radiation 90 days prior to ED visit | 1.25          | 1.22-1.29 | <b>1.09</b> | <b>1.06-1.12</b> |
| Cancer type                         |               |           |             |                  |
| Gastrointestinal                    | REF           |           | REF         |                  |
| Hematological                       | 1.05          | 1.02-1.09 | <b>1.13</b> | <b>1.09-1.17</b> |
| Breast                              | 0.62          | 0.60-0.64 | <b>0.77</b> | <b>0.74-0.80</b> |
| Lung                                | 1.23          | 1.19-1.27 | 1.00        | 0.96-1.04        |
| Gynecological                       | 0.91          | 0.87-0.95 | <b>0.92</b> | <b>0.88-0.97</b> |
| Male genital                        | 0.96          | 0.91-1.01 | 0.95        | 0.90-1.00        |
| Genitourinary                       | 1.01          | 0.96-1.07 | 0.98        | 0.92-1.04        |
| Head and neck                       | 0.91          | 0.86-0.96 | <b>0.89</b> | <b>0.84-0.95</b> |
| Neurological                        | 1.15          | 1.08-1.23 | 0.94        | 0.87-1.02        |
| Melanoma                            | 1.0           | 0.93-1.07 | 0.96        | 0.88-1.03        |
| Bone/soft tissue                    | 1.22          | 1.11-1.33 | <b>1.13</b> | <b>1.02-1.24</b> |
| Endocrine                           | 0.97          | 0.72-1.30 | 0.90        | 0.67-1.22        |
| Other                               | 1.05          | 0.98-1.13 | 1.02        | 0.94-1.11        |
| Ambulance arrival                   | 3.74          | 3.66-3.82 | <b>3.50</b> | <b>3.42-3.59</b> |
| CTAS Triage acuity                  |               |           |             |                  |
| 3                                   | REF           |           | REF         |                  |
| 1-2 (highest acuity)                | 2.27          | 2.23-2.31 | <b>2.09</b> | <b>2.05-2.14</b> |
| 4-5 (lowest acuity)                 | 0.19          | 0.18-0.20 | <b>0.29</b> | <b>0.28-0.31</b> |
| Shift                               |               |           |             |                  |
| Day (8:00-16:59)                    | REF           |           | REF         |                  |
| Evening (17:00 – 23:59)             | 1.20          | 1.17-1.22 | 0.99        | 0.96-1.01        |
| Night (0:00 – 7:59)                 | 1.22          | 1.19-1.25 | <b>0.94</b> | <b>0.92-0.97</b> |

|                              |      |           |             |                  |
|------------------------------|------|-----------|-------------|------------------|
| Weekend                      | 0.91 | 0.90-0.93 | <b>0.90</b> | <b>0.88-0.92</b> |
| Hospital type                |      |           |             |                  |
| Small                        | REF  |           | REF         |                  |
| Community                    | 2.10 | 2.01-2.20 | <b>1.12</b> | <b>1.06-1.17</b> |
| Academic                     | 3.36 | 3.21-3.52 | <b>1.80</b> | <b>1.71-1.89</b> |
| ED Diagnosis                 |      |           |             |                  |
| None of top 10 diagnoses     | REF  |           | REF         |                  |
| Infection                    | 1.67 | 1.63-1.71 | <b>1.72</b> | <b>1.67-1.77</b> |
| Gastrointestinal             | 1.49 | 1.44-1.54 | <b>1.56</b> | <b>1.50-1.61</b> |
| Pain                         | 0.56 | 0.54-0.58 | <b>0.48</b> | <b>0.46-0.50</b> |
| Injury/MSK                   | 0.36 | 0.35-0.38 | <b>0.39</b> | <b>0.37-0.41</b> |
| Pulmonary                    | 1.50 | 1.44-1.57 | <b>1.28</b> | <b>1.23-1.34</b> |
| Cardiac                      | 1.74 | 1.66-1.82 | <b>1.17</b> | <b>1.11-1.23</b> |
| Weakness, social             | 2.10 | 2.01-2.19 | <b>1.52</b> | <b>1.45-1.60</b> |
| Device/graft related         | 0.19 | 0.18-0.21 | <b>0.31</b> | <b>0.28-0.34</b> |
| Ill-defined                  | 0.16 | 0.15-0.18 | <b>0.32</b> | <b>0.29-0.35</b> |
| Genitourinary/<br>Nephrology | 1.15 | 1.08-1.22 | <b>1.22</b> | <b>1.14-1.29</b> |

ED = emergency department; OR = odds ratio; CI = confidence interval; CTAS = Canadian Triage and Acuity Scale; MSK = musculoskeletal; REF = reference category

## Appendix

**Methods.** Additional information regarding data sources and covariates

**Table 1:** Categorization of ICD-10 codes

**Table 2:** ICD-O Codes to classify cancer type

**Table 3:** Palliative care codes and databases

### Methods:

#### Data Sources

Patients with cancer were identified from the Ontario Cancer Registry (OCR). The OCR contains information on all diagnosed cases of cancer in Ontario (except basal and squamous cell skin cancers). Using methods previously described, data regarding chemotherapy were obtained from the Cancer Activity Level Reporting database (ALR), the New Drug Funding database, and claims for the supervision of chemotherapy in the Ontario Health Insurance Plan database (OHIP).<sup>1,2</sup> Data regarding radiation were obtained from the ALR database.<sup>2</sup>

ED visits were identified from the Canadian Institutes of Health Information National Ambulatory Care Reporting System (CIHI-NACRS). NACRS is an administrative database that contains anonymized, abstracted data on all ED patient visits in the province of Ontario; it contains over 300 data points on every ED visit. Reporting to NACRS is mandatory in Ontario. Data in NACRS are reviewed and errors and/or missing data are identified, and returned to the submitting hospital as necessary for resubmission; therefore, missing data for mandatory variables in NACRS is very low.<sup>3</sup>

CIHI's Discharge Abstract Database (DAD) contains information on all acute care hospitalizations in the province. The Ontario Health Insurance Plan (OHIP) database contains all physician billings for medically-necessary care. The Registered Persons Database contains validated mortality information for all Ontario residents, including out-of-hospital deaths.<sup>4</sup>

#### Diagnoses

The primary ED diagnoses were categorized into general categories based on the *International Classification of Diseases – 10<sup>th</sup> Edition* (ICD-10) codes. See Table 1 for categorization of ICD-10 codes.

#### Covariates

Cancer type was categorized into broad categories based on ICD-O codes. See Table 2 for codes to classify cancer type. Receipt of palliative consultation was determined by an approach previously used at ICES which uses several databases to ascertain inpatient or outpatient palliative care treatment or consults. Patients were considered to have received palliative consultation if they had a palliative care code, end of life code, or hospice care code in any one of eight databases in the two years prior to the ED visit. See Table 3 for the databases and codes used to identify patients who received palliative consultation.

The triage score of patients was based on the Canadian Triage and Acuity Scale (CTAS). EDs across Canada use the CTAS score to triage patients based on medical acuity. A triage nurse assigns a CTAS score to each patient on arrival to the ED. The score ranges from the 1 (resuscitation) to 5 (non-urgent), and has been validated and found to be reliable.<sup>5</sup>

#### References

1. de Oliveira C, Bremner KE, Pataky R, et al. Understanding the costs of cancer care before and after diagnosis for the 21 most common cancers in Ontario: A population-based descriptive study. *CMAJ Open*. 2013;**1**(1):E1-8.
2. Mittmann N, Seung SJ, Liu N, et al. Population-based utilization of radiation therapy by a Canadian breast cancer cohort. *Curr Oncol*. 2014;**21**(5):715-7.
3. Canadian Institute for Health Information. CIHI data quality study of Ontario emergency department visits for fiscal year 2004–2005: Executive summary. CIHI: Ottawa, ON. 2008.
4. Iron K, Zagorski BM, Sykora K, Manuel DG. Living and dying in Ontario: An opportunity for improved health information. [http://www.ices.on.ca/file/Living\\_and\\_dying\\_in\\_Ontario\\_March19-08.pdf](http://www.ices.on.ca/file/Living_and_dying_in_Ontario_March19-08.pdf). 2009. Accessed August 26, 2015



1  
2  
3  
4  
5  
6  
7  
8  
9  
10  
11  
12  
13  
14  
15  
16  
17  
18  
19  
20  
21  
22  
23  
24  
25  
26  
27  
28  
29  
30  
31  
32  
33  
34  
35  
36  
37  
38  
39  
40  
41  
42  
43  
44  
45  
46  
47  
48  
49  
50  
51  
52  
53  
54  
55  
56  
57  
58  
59  
60

5. Mirhaghi A, Heydari A, Mazlom R, Ebrahimi M. The reliability of the Canadian Triage and Acuity Scale: Meta-analysis. *N Am J Med Sci.* 2015;7(7):299-305.

Confidential

**Table 1: Categorization of ICD-10 codes**

| Category                       | ICD-10 codes                                                                                                                                                                                                                                                                                                                                                                                                                                                                                                                                                                                                                                                                                                                                                                                                                                                               |
|--------------------------------|----------------------------------------------------------------------------------------------------------------------------------------------------------------------------------------------------------------------------------------------------------------------------------------------------------------------------------------------------------------------------------------------------------------------------------------------------------------------------------------------------------------------------------------------------------------------------------------------------------------------------------------------------------------------------------------------------------------------------------------------------------------------------------------------------------------------------------------------------------------------------|
| Arrest                         | I460, I461, I469, R092, R961, R98, R99                                                                                                                                                                                                                                                                                                                                                                                                                                                                                                                                                                                                                                                                                                                                                                                                                                     |
| Breast                         | N645, N648, N649, S200, S201, S2100, S2101                                                                                                                                                                                                                                                                                                                                                                                                                                                                                                                                                                                                                                                                                                                                                                                                                                 |
| Cancer                         | C00, D0007, D001, D01, D011, D015, D022, D035, D036, D039, D059, D0590, D0591, D0599, D060, D075, D091, D099, Z031, Z080, Z081, Z082, Z087, Z088, Z089, Z090, Z091, Z092, Z113, Z114, D131, D151, D163, D166, D169, D172, D175, D179, D1808, D1809, D181, D234, D24, D252, D259, D27, D287, D291, D320, D329, D332, D352, D367, D3708, D371, D372, D373, D374, D375, D376, D377, D379, D380, D381, D383, D385, D391, D392, D397, D400, D401, D410, D414, D430, D431, D432, D434, D439, D443, D479, D480, D481, D482, D484, D485, D486, D487, D489, N608, N609, N62, N63, N644                                                                                                                                                                                                                                                                                              |
| Cardiac                        | E877, I100, I101, I11, I13, I059, I200, I201, I2080, I2088, I209, I210, I211, I212, I213, I214, I219, I229, I236, I2388, I240, I248, I249, I2510, I2519, I253, I255, I259, I308, I309, I311, I313, I319, I330, I340, I350, I351, I358, I420, I421, I427, I428, I429, I440, I441, I442, I443, I447, I451, I453, I455, I459, I470, I471, I472, I479, I4800, I4801, I4802, I483, I484, I4890, I4891, I4900, I491, I492, I493, I494, I495, I498, I499, I500, I501, I509, I510, I514, I515, I516, I517, I518, I519, J81, R000, R001, R002, R008, R030, R098, R55, R570, R931, R9430, R9431, R9438, Z031, Z035, Z136                                                                                                                                                                                                                                                             |
| Chemotherapy/<br>radiation     | Z292, Z510, Z511, Z512                                                                                                                                                                                                                                                                                                                                                                                                                                                                                                                                                                                                                                                                                                                                                                                                                                                     |
| Dental                         | K028, K029, K036, K040, K045, K047, K049, K050, K051, K052, K053, K056, K068, K069, K072, K0761, K0762, K0763, K0764, K0768, K0769, K079, K0887, K0888, K102, K103, K108, K109                                                                                                                                                                                                                                                                                                                                                                                                                                                                                                                                                                                                                                                                                             |
| Dermatological                 | B081, B082, L109, L139, L208, L209, L219, L22, L231, L233, L235, L237, L238, L239, L245, L248, L249, L250, L251, L253, L255, L258, L259, L26, L270, L271, L278, L279, L280, L282, L293, L298, L299, L301, L302, L304, L308, L309, L401, L405, L408, L409, L42, L500, L501, L508, L509, L511, L512, L519, L52, L530, L538, L539, L551, L552, L558, L559, L561, L568, L569, L570, L579, L580, L589, L590, L598, L599, L600, L601, L602, L608, L609, L700, L708, L709, L718, L719, L720, L721, L728, L729, L731, L732, L738, L739, L740, L80, L814, L819, L82, L84, L853, L858, L859, L88, L89, L890, L891, L892, L893, L898, L899, L900, L905, L906, L918, L922, L929, L930, L931, L949, L959, L97, L982, L984, L988, L989, R21, R220, R221, R222, R223, R224, R227, R229, R230, R232, R233, R234, R238, R619                                                                |
| Drug side effects/<br>toxicity | G211, G210, G240, G251, G620, G720, I952, T360, T361, T368, T369, T370, T371, T375, T378, T379, T380, T381, T383, T387, T388, T389, T390, T391, T393, T398, T402, T403, T404, T406, T412, T420, T421, T422, T423, T424, T426, T427, T428, T430, T432, T433, T435, T436, T443, T447, T448, T450, T451, T452, T455, T457, T458, T460, T461, T462, T464, T465, T472, T481, T484, T490, T493, T494, T495, T507, T508, T509, T528, T529, T549, T55, T568, T58, T594, T597, T598, T612, T628, T629, T634, T658, T659, T66, T7800, T7802, T7803, T7808, T781, T782, T783, T784, T788, T789, T805, T881, T885, T886, T887, Z036                                                                                                                                                                                                                                                    |
| Electrolytes                   | E340, E611, E612, E790, E806, E8310, E8319, E833, E834, E835, E838, E870, E871, E872, E873, E875, E876, E878, E880, E883                                                                                                                                                                                                                                                                                                                                                                                                                                                                                                                                                                                                                                                                                                                                                   |
| Endocrine                      | E038, E039, E040, E041, E049, E059, E0788, E100, E1010, E1023, E1028, E1040, E1052, E1063, E1064, E1068, E1070, E1071, E109, E110, E1110, E1111, E1123, E1128, E1130, E1136, E1140, E1141, E1142, E1150, E1151, E1152, E1160, E1163, E1164, E1168, E1170, E1171, E1178, E119, E1310, E1328, E1363, E1364, E1368, E139, E140, E1410, E1411, E1412, E1423, E1428, E1440, E1441, E1442, E1450, E1451, E1452, E1460, E1461, E1463, E1464, E1468, E1470, E1471, E1478, E14780, E160, E161, E162, E210, E213, E222, E232, E236, E242, E249, E271, E272, E273, E274, E890, E891, R730, R73812, R739, R946, Z131                                                                                                                                                                                                                                                                   |
| ENT                            | H605, H608, H609, H612, H619, H652, H680, H681, H690, H699, H729, H730, H740, H742, H748, H749, H810, H811, H812, H813, H818, H819, H830, H838, H839, H905, H918, H919, H920, H922, H931, H932, H938, H939, H958, T16, T700, J302, J304, J310, J320, J321, J323, J328, J329, J338, J342, J3488, J350, J351, J370, J3801, J3802, J3809, J381, J383, J384, J385, J386, J387, J955, K112, K114, K115, K116, K117, K118, K119, K130, K132, K137, K140, K141, K143, K146, K148, K149, R040, R041, R042, R066, R070, R490, R491, R498, T170, T171, T172, T173, T174, T180                                                                                                                                                                                                                                                                                                        |
| Environmental                  | R680, T335, T354, T670, T675, T678, T68, T699, T732, T751, T753, T754, T7588, T702, Z578, Z585                                                                                                                                                                                                                                                                                                                                                                                                                                                                                                                                                                                                                                                                                                                                                                             |
| Gastrointestinal               | I850, I864, K3180, K5520, K625, K920, K921, K922, K2211, K2214, K226, K251, K254, K255, K256, K260, K261, K264, K265, K271, K274, K275, K285, K290, K20, K210, K219, K220, K2213, K2219, K222, K223, K224, K225, K228, K229, K259, K269, K279, K289, K291, K292, K295, K296, K297, K298, K30, K3188, K500, K508, K509, K510, K512, K513, K514, K518, K519, K550, K551, K558, K559, K561, K580, K589, K590, K591, K593, K594, K598, K599, K600, K602, K621, K623, K624, K626, K627, K628, K629, K634, K6388, K639, K640, K6411, K6420, K6421, K6430, K644, K645, K648, K649, K660, K668, K669, K900, K904, K909, K911, K912, K918, K919, K9280, K9288, K929, R110, R111, R112, R113, R12, R130, R132, R138, R14, R15, R160, R161, R162, R17, R18, R190, R194, R1950, R1958, R198, R933, R935, T181, T182, T185, T189, K402, K409, K412, K419, K429, K432, K435, K439, K449, |

|                              |                                                                                                                                                                                                                                                                                                                                                                                                                                                                                                                                                                                                                                                                                                                                                                                                                                                                                                                                                                                                                                                                                                                                                                                                                                                                                                                                                                                                                                                                                                                                                                                                                                                                                                                                                                                                                                                                                                                                                                                                                                                                                                                                                                 |
|------------------------------|-----------------------------------------------------------------------------------------------------------------------------------------------------------------------------------------------------------------------------------------------------------------------------------------------------------------------------------------------------------------------------------------------------------------------------------------------------------------------------------------------------------------------------------------------------------------------------------------------------------------------------------------------------------------------------------------------------------------------------------------------------------------------------------------------------------------------------------------------------------------------------------------------------------------------------------------------------------------------------------------------------------------------------------------------------------------------------------------------------------------------------------------------------------------------------------------------------------------------------------------------------------------------------------------------------------------------------------------------------------------------------------------------------------------------------------------------------------------------------------------------------------------------------------------------------------------------------------------------------------------------------------------------------------------------------------------------------------------------------------------------------------------------------------------------------------------------------------------------------------------------------------------------------------------------------------------------------------------------------------------------------------------------------------------------------------------------------------------------------------------------------------------------------------------|
|                              | K458, K469, K311, K315, K400, K403, K413, K420, K430, K433, K436, K450, K460, K560, K562, K563, K564, K565, K566, K567, K913, K316, K603, K604, K632, T8182, T8183, K352, K353, K358, K36, K37, K388, K570, K571, K572, K573, K574, K575, K578, K579, K8000, K8001, K8010, K8011, K8020, K8021, K8030, K8031, K8040, K8041, K8050, K8051, K8081, K810, K811, K818, K819, K820, K822, K828, K829, K831, K832, K835, K838, K839, K851, K852, K853, K858, K859, K861, K862, K863, K868, K869, K631, K650, K658, K659, K661, R100, A099, B085, K520, K521, K523, K528, K529, A690, A691, B084, K120, K121, K123, K700, K701, K703, K711, K716, K720, K729, K746, K751, K752, K754, K759, K760, K762, K763, K767, K768, K769, K8300, K8301, R740, R932, R945, D735, D738                                                                                                                                                                                                                                                                                                                                                                                                                                                                                                                                                                                                                                                                                                                                                                                                                                                                                                                                                                                                                                                                                                                                                                                                                                                                                                                                                                                             |
| Genitourinary/<br>nephrology | I861, N005, N009, N039, N049, N059, N10, N110, N111, N118, N119, N12, N130, N131, N132, N133, N134, N135, N136, N138, N139, N140, N141, N151, N159, N170, N178, N179, N182, N183, N185, N189, N19, N200, N201, N202, N209, N210, N211, N219, N23, N258, N259, N280, N281, N2888, N289, N301, N304, N308, N309, N312, N319, N320, N321, N322, N324, N328, N329, N342, N359, N360, N368, N369, N391, N3939, N394, N398, N399, N40, N410, N418, N419, N4288, N432, N433, N4408, N470, N471, N481, N4828, N483, N485, N488, N489, N492, N498, N499, N5010, N5018, N508, N509, N990, N998, N999, R300, R309, R310, R311, R318, R32, R33, R34, R350, R358, R36, R390, R3910, R3911, R3913, R3914, R3918, R392, R398, R80, R81, R827, R829, R860, R944, Z492,                                                                                                                                                                                                                                                                                                                                                                                                                                                                                                                                                                                                                                                                                                                                                                                                                                                                                                                                                                                                                                                                                                                                                                                                                                                                                                                                                                                                          |
| Graft/stoma/<br>devices      | K9140, K9142, K9143, K9145, K9160, K9162, J9500, J9502, J9503, J9508, N9950, N9952, T8188, T819, T820, T821, T822, T823, T824, T825, T828, T829, T83, T830, T831, T834, T848, T849, T850, T852, T854, T855, T856, T858, T859, T86000, T86001, T86100, T86200, T86400, T86401, T8767, T838, T839, T8400, T8403, T84030, T84031, T84033, T84038, T8404, T84043, T8408, T8410, T8413, T8414, T8420, T8423, T8424, T8428, T844, Z430, Z431, Z432, Z433, Z434, Z435, Z436, Z438, Z439, Z450, Z4500, Z4501, Z4502, Z4508, Z451, Z452, Z458, Z459, Z460, Z462, Z464, Z465, Z466, Z467, Z468, Z469, Z470                                                                                                                                                                                                                                                                                                                                                                                                                                                                                                                                                                                                                                                                                                                                                                                                                                                                                                                                                                                                                                                                                                                                                                                                                                                                                                                                                                                                                                                                                                                                                                |
| Gynecological                | N750, N760, N762, N765, N766, N7680, N811, N812, N813, N814, N816, N820, N823, N824, N825, N829, N830, N832, N834, N838, N839, N840, N842, N843, N858, N859, N898, N899, N904, N905, N907, N908, N915, N920, N921, N926, N930, N938, N939, N941, N946, N948, N949, N950, N952, N981, T192, O019, O020, O039, O044, O16003, O16004, O20003, O20903, O21103, O23403, O72204, O75103, O86404, O90204, O91204, O99603, P768                                                                                                                                                                                                                                                                                                                                                                                                                                                                                                                                                                                                                                                                                                                                                                                                                                                                                                                                                                                                                                                                                                                                                                                                                                                                                                                                                                                                                                                                                                                                                                                                                                                                                                                                         |
| Hematological                | D45, D465, D467, D469, D471, D472, D473, D474, D67, D683, D684, D685, D686, D688, D689, D698, D699, D721, D748, D751, D7581, D7588, D759, D801, D841, D848, D899, R701, R71, T803, T806, T808, T809, Z130, D500, D508, D509, D510, D513, D518, D519, D521, D529, D538, D539, D570, D571, D582, D589, D590, D591, D592, D594, D598, D599, D609, D610, D611, D612, D613, D618, D619, D62, D641, D642, D643, D648, D649, Z513, D691, D692, D6930, D6938, D694, D695, D696, D708, D720, D728, D729, R72                                                                                                                                                                                                                                                                                                                                                                                                                                                                                                                                                                                                                                                                                                                                                                                                                                                                                                                                                                                                                                                                                                                                                                                                                                                                                                                                                                                                                                                                                                                                                                                                                                                             |
| Ill-defined                  | D860, D868, D869, E854, E858, E859, E840, E841, Q063, Q181, Q204, Q2738, Q278, Q282, Q288, Q311, Q419, Q438, Q443, Q644, Q743, Q998, R628, R629, T888, T889, Z000, Z015, Z016, Z017, Z018, Z019, Z027, Z0288, Z029, Z038, Z039, Z048, Z097, Z098, Z099, Z115, Z128, Z121, Z138, Z139, Z201, Z203, Z204, Z208, Z235, Z242, Z251, Z271, Z278, Z291, Z298, Z299, Z300, Z304, Z480, Z488, Z489, Z710, Z509, Z514, Z5188, Z519, Z530, Z532, Z538, Z558, Z642, Z7688, Z769, Z760, Z718, Z719, Z712                                                                                                                                                                                                                                                                                                                                                                                                                                                                                                                                                                                                                                                                                                                                                                                                                                                                                                                                                                                                                                                                                                                                                                                                                                                                                                                                                                                                                                                                                                                                                                                                                                                                    |
| Infection/fever              | A01, A029, A040, A044, A045, A046, A047, A048, A049, A059, A061, A071, A073, A078, A083, A084, A085, A09, A1690, A199, A319, A327, A370, A379, A38, A394, A400, A401, A403, A408, A409, A410, A411, A412, A414, A4150, A4151, A4152, A4158, A4180, A4188, A419, A42, A420, A46 A480, A488, A490, A491, A498, A499, A521, A527, A568, A590, A599, A600, A60, A630, A64, A692, A812, A879, A99, B00, B001, B002, B003, B005, B009, B019, B022, B023, B027, B028, B029, B07, B088, B09, B169, B179, B181, B182, B24, B258, B259, B269, B278, B279, B303, B341, B348, B349, B350, B351, B352, B353, B354, B356, B358, B359, B360, B369, B370, B372, B373, B374, B377, B3780, B3788, B379, B407, B409, B429, B448, B465, B488, B49, B580, B589, B59, B820, B852, B86, B874, B878, B879, B99, D700, G009, G030, G038, G039, G048, G049, G060, G06, G062, G360, G373, H600, H601, H602, H603, H650, H651, H659, H660, H664, H669, H700, H709, I38, J00, J010, J011, J012, J018, J019, J020, J028, J029, J030, J039, J040, J041, J050, J051, J060, J068, J069, J09, J100, J101, J110, J111, J118, J121, J122, J128, J129, J13, J14, J150, J151, J152, J154, J157, J159, J168, J180, J181, J188, J189, J205, J2088, J22, J340, J36, J390, J851, J852, K113, K122, K610, K611, K612, K613, K630, K8302, K8308, K9141, K9144, K9161, L010, L020, L021, L022, L023, L024, L028, L029, L0300, L0301, L0310, L0311, L032, L0330, L0331, L0332, L0333, L0334, L0335, L0336, L0339, L038, L039, L040, L041, L042, L050, L059, L080, L088, L089, M0001, M0006, M0091, M0092, M0093, M0094, M0095, M0096, M0097, M0098, M0099, M4622, M4625, M4628, M4644, M4646, M4647, M4649, M6005, M6006, M6008, M7105, M7111, M7112, M7116, M7260, M7263, M7265, M7266, M7267, M7268, M7269, M8617, M8618, M8665, M8688, M8690, M8694, M8695, M8696, M8697, M8698, M8699, M8792, M8795, N300, N390, N412, N413, N4500, N450, N4590, N459, N4592, N4820, N4821, N493, N700, N701, N730, N739, N751, N764, N9951, R02, R502, R508, R509, R572, T793, T802, T814, T826, T827, T82701, T82700, T82709, T8279, T835, T836, T8450, T8453, T8454, T8463, T8468, T847, T857, T8748, T880, Z113, Z114 |
| Inflammatory/<br>immune      | M6088, M6096, M6098, M6099, N61, N719, Q822, R590, R591, R599, R700, R768, R769                                                                                                                                                                                                                                                                                                                                                                                                                                                                                                                                                                                                                                                                                                                                                                                                                                                                                                                                                                                                                                                                                                                                                                                                                                                                                                                                                                                                                                                                                                                                                                                                                                                                                                                                                                                                                                                                                                                                                                                                                                                                                 |

|            |                                                                                                                                                                                                                                                                                                                                                                                                                                                                                                                                                                                                                                                                                                                                                                                                                                                                                                                                                                                                                                                                                                                                                                                                                                                                                                                                                                                                                                                                                                                                                                                                                                                                                                                                                                                                                                                                                                                                                                                                                                                                                                                                                                                                                                                                                                                                                                                                                                                                                                                                                                                                                                                                                                                                                                                                                                                                                                                                                                                                                                                                                                                                                                                                                                                                                                                                                                                                                                                                                                                                                                                                                                                                                                                                                                                                                                                                                                                                                                                                                                                                                                                                                                                                                                                                                                                                                                                                                                                                                                                                                                                                                                                                                                                                                                                                                                                                                                                                                                                                                                                                                                                                                                                                                                                                                                                                                                                                                                                                                                                                                                                                                                                                                                                                                                                                                                                                                                                                                                    |
|------------|--------------------------------------------------------------------------------------------------------------------------------------------------------------------------------------------------------------------------------------------------------------------------------------------------------------------------------------------------------------------------------------------------------------------------------------------------------------------------------------------------------------------------------------------------------------------------------------------------------------------------------------------------------------------------------------------------------------------------------------------------------------------------------------------------------------------------------------------------------------------------------------------------------------------------------------------------------------------------------------------------------------------------------------------------------------------------------------------------------------------------------------------------------------------------------------------------------------------------------------------------------------------------------------------------------------------------------------------------------------------------------------------------------------------------------------------------------------------------------------------------------------------------------------------------------------------------------------------------------------------------------------------------------------------------------------------------------------------------------------------------------------------------------------------------------------------------------------------------------------------------------------------------------------------------------------------------------------------------------------------------------------------------------------------------------------------------------------------------------------------------------------------------------------------------------------------------------------------------------------------------------------------------------------------------------------------------------------------------------------------------------------------------------------------------------------------------------------------------------------------------------------------------------------------------------------------------------------------------------------------------------------------------------------------------------------------------------------------------------------------------------------------------------------------------------------------------------------------------------------------------------------------------------------------------------------------------------------------------------------------------------------------------------------------------------------------------------------------------------------------------------------------------------------------------------------------------------------------------------------------------------------------------------------------------------------------------------------------------------------------------------------------------------------------------------------------------------------------------------------------------------------------------------------------------------------------------------------------------------------------------------------------------------------------------------------------------------------------------------------------------------------------------------------------------------------------------------------------------------------------------------------------------------------------------------------------------------------------------------------------------------------------------------------------------------------------------------------------------------------------------------------------------------------------------------------------------------------------------------------------------------------------------------------------------------------------------------------------------------------------------------------------------------------------------------------------------------------------------------------------------------------------------------------------------------------------------------------------------------------------------------------------------------------------------------------------------------------------------------------------------------------------------------------------------------------------------------------------------------------------------------------------------------------------------------------------------------------------------------------------------------------------------------------------------------------------------------------------------------------------------------------------------------------------------------------------------------------------------------------------------------------------------------------------------------------------------------------------------------------------------------------------------------------------------------------------------------------------------------------------------------------------------------------------------------------------------------------------------------------------------------------------------------------------------------------------------------------------------------------------------------------------------------------------------------------------------------------------------------------------------------------------------------------------------------------------------------------------|
| Injury/MSK | M064, M068, M069, M1000, M1002, M1006, M1007, M1017, M1021, M1027, M1037, M1090, M1091, M1092, M1093, M1094, M1096, M1097, M1098, M1099, M1123, M1126, M1127, M1193, M1254, M130, M1313, M1314, M1316, M1317, M1319, M1380, M1384, M1387, M1390, M1391, M1392, M1393, M1394, M1395, M1396, M1397, M1398, M1399, M159, M160, M161, M169, M170, M171, M173, M174, M175, M179, M189, M190, M198, M199, M200, M201, M206, M213, M216, M224, M2321, M238, M239, M2401, M2427, M2441, M2445, M2458, M2491, M2501, M2502, M2505, M2506, M2507, M2540, M2541, M2542, M2543, M2544, M2545, M2546, M2547, M2548, M2565, M2566, M2568, M2569, M2583, M2585, M2594, M2595, M2596, M4029, M4196, M4302, M4316, M4318, M436, M45, M4602, M461, M4714, M4719, M4782, M4786, M4787, M4796, M4797, M4800, M4802, M4804, M4806, M4807, M4809, M4844, M4846, M4849, M4854, M4855, M4856, M4859, M4882, M4892, M4894, M4899, M500, M501, M502, M503, M508, M511, M512, M513, M518, M519, M5326, M5329, M533, M5382, M5396, M5410, M5412, M5413, M5414, M5416, M5417, M5418, M5419, M542, M543, M544, M548, M549, M6155, M6208, M6223, M6224, M6225, M6226, M6227, M6248, M6260 M6261, M6262, M6263, M6265, M6266, M6267, M6268, M6269, M6280, M6281, M6282, M6284, M6285, M6286, M6288, M6289, M6290, M6298, M6299, M6522, M6526, M6528, M653, M654, M6583, M6584, M6586, M6588, M6590, M6591, M6592, M6593, M6594, M6595, M6596, M6597, M6598, M660, M6647, M6743, M6799, M702, M703, M704, M705, M706, M707, M708, M712, M7157, M719, M7190, M7192, M722, M750, M751, M752, M753, M754, M755, M758, M763, M765, M766, M768, M770, M771, M772, M773, M774, M775, M778, M779 M7903, M7904, M7910, M7911, M7912, M7913, M7914, M7915, M7916, M7918, M7919 M7920, M7921, M7922, M7924, M7925, M7926, M7927, M7928, M7929, M7938, M7954, M7957, M7958, M797, M7980, M7981, M7982, M7983, M7984, M7985, M7986, M7987, M7988, M7989, M7990, M7991, M7995, M7996, M7998, M8088, M8095, M8098, M819, M8403, M8412, M8415, M8435, M8436, M8437, M8438, M8440, M8441, M8442, M8443, M8445, M8446, M8448, M8449, M8485, M8900, M8901, M8956, M8958, M8980, M8983, M8985, M8986, M8987, M8988, M8989, M8992, M8993, M8995, M8996, M8998, M940, M941, M9488, M966, M9668, M968, Q780, R294, R936, S000, S003, S004, S005, S007, S008, S009, S0100, S0101, S0120, S0121, S0130, S0131, S0140, S0150, S0170, S0180, S0181, S0190, S02000, S02100, S02200, S02201, S02300, S02410, S02420, S02480, S02490, S02491, S025, S02600, S02610, S02670, S02700, S02890, S02900, S030, S032, S034, S060, S081, S0918, S092, S097, S098, S099, S108, S109, S1170, S1180, S1190, S12000, S12100, S12200, S12210, S12700, S12800, S12900, S130, S1340, S1341, S1342, S1348, S136, S168, S170, S198, S199, S202, S203, S204, S207, S208, S2110, S2111, S2190, S22000, S22010, S22011, S22090, S22100, S22200, S22300, S22301, S22400, S22401, S22410, S22490, S22500, S22900, S232, S233, S234, S235, S2419, S2428, S26800, S27000, S27100, S27200, S27300, S27600, S27810, S27860, S2908, S298, S299, S300, S301, S3021, S307, S3080, S3081, S3083, S3084, S3085, S3088, S309, S31000, S31001, S31120, S31121, S31130, S31131, S31200, S31400, S31800, S32000, S32010, S32020, S32030, S32040, S32090, S32100, S32200, S32300, S32400, S32500, S32700, S32800, S334, S335, S337, S359, S36090, S36150, S36800, S36990, S37000, S37090, S37390, S380, S3908, S397, S398, S399, S400, S407, S408, S409, S4110, S4111, S4170, S42000, S42010, S42020, S42090, S42100, S42120, S42180, S42190, S42200, S42210, S42220, S42280, S42290, S42300, S42390, S42400, S42420, S42430, S42480, S42490, S42491, S42700, S42800, S42900, S43000, S43010, S43020, S43090, S43100, S43200, S43380, S43390, S43401, S43402, S435, S4378, S4379, S4600, S4608, S4620, S4628, S4680, S4688, S4698, S497, S498, S499, S500, S501, S509, S508, S507, S5100, S5101, S5170, S5181, S5190, S5180, S5191, S52000, S52010, S52020, S52080, S52090, S52100, S52110, S52120, S52190, S52200, S52300, S52400, S52500, S52580, S52581, S52590, S52591, S52600, S52601, S52700, S52701, S52800, S52900, S530, S53100, S53110, S53180, S53190, S5341, S5349, S552, S559, S5610, S5658, S598, S599, S600, S601, S602, S607, S608, S609, S6100, S6101, S6110, S6111, S612, S6170, S6180, S6181, S6190, S6191, S62000, S62110, S62111, S62130, S62160, S62180, S62190, S62200, S62210, S62300, S62310, S62320, S62390, S62400, S62411, S62490, S62500, S62510, S62511, S62590, S62591, S62600, S62601, S62610, S62611, S62670, S62690, S62691, S62700, S62800, S63100, S63110, S63180, S63190, S6358, S6359, S6361, S6368, S6369, S6371, S6378, S6379, S6440, S6448, S6608, S6610, S6630, S6638, S6670, S6680, S670, S680, S681, S682, S698, S699, S700, S701, S708, S709, S7100, S7110, S7170, S7171, S72000, S72010, S72080, S72090, S72100, S72190, S72200, S72300, S72400, S72410, S72420, S72490, S72491, S72700, S72800, S72900, S73000, S73080, S73090, S7318, S7319, S7608, S7610, S7618, S7628, S7630, S7638, S7648, S7678, S798, S799, S800, S801, S807, S808, S809, S8100, S8101, S8170, S8180, S8181, S8190, S8191, S82000, S82100, S82200, S82300, S82301, S82400, S82500, S82600, S82601, S82800, S82810, S82820, S82890, S82891, S82900, S83000, S8320, S8329, S833, S83400, S83401, S83411, S83500, S836, S837, S8600, S8608, S8610, S8618, S8678, S8690, S8698, S898, S899, S900, S901, S902, S903, S907, S908, S909, S9100, S9110, S9111, S9120, S9121, S9130, S9131, S92000, S92100, S92200, S92211, S92290, S92300, S92400, S92401, S92500, S92501, S92700, S92900, S93000, S93110, S93300, S9348, S9349, S9351, S936, S9698, S984, S998, S999, T000, T001, T002, T003, T006, T008, T009, T0120, T0130, T0160, T0180, T0181, T0210, T0250, T0270, T031, T068, T07, T080, T090, T091, T095, T098, T099, T110, T111, T112, T118, T119, T130, T131, T132, T135, T139, T140, T141, T1420, T143, T144, T146, T147, T148, T149, T200, |
|------------|--------------------------------------------------------------------------------------------------------------------------------------------------------------------------------------------------------------------------------------------------------------------------------------------------------------------------------------------------------------------------------------------------------------------------------------------------------------------------------------------------------------------------------------------------------------------------------------------------------------------------------------------------------------------------------------------------------------------------------------------------------------------------------------------------------------------------------------------------------------------------------------------------------------------------------------------------------------------------------------------------------------------------------------------------------------------------------------------------------------------------------------------------------------------------------------------------------------------------------------------------------------------------------------------------------------------------------------------------------------------------------------------------------------------------------------------------------------------------------------------------------------------------------------------------------------------------------------------------------------------------------------------------------------------------------------------------------------------------------------------------------------------------------------------------------------------------------------------------------------------------------------------------------------------------------------------------------------------------------------------------------------------------------------------------------------------------------------------------------------------------------------------------------------------------------------------------------------------------------------------------------------------------------------------------------------------------------------------------------------------------------------------------------------------------------------------------------------------------------------------------------------------------------------------------------------------------------------------------------------------------------------------------------------------------------------------------------------------------------------------------------------------------------------------------------------------------------------------------------------------------------------------------------------------------------------------------------------------------------------------------------------------------------------------------------------------------------------------------------------------------------------------------------------------------------------------------------------------------------------------------------------------------------------------------------------------------------------------------------------------------------------------------------------------------------------------------------------------------------------------------------------------------------------------------------------------------------------------------------------------------------------------------------------------------------------------------------------------------------------------------------------------------------------------------------------------------------------------------------------------------------------------------------------------------------------------------------------------------------------------------------------------------------------------------------------------------------------------------------------------------------------------------------------------------------------------------------------------------------------------------------------------------------------------------------------------------------------------------------------------------------------------------------------------------------------------------------------------------------------------------------------------------------------------------------------------------------------------------------------------------------------------------------------------------------------------------------------------------------------------------------------------------------------------------------------------------------------------------------------------------------------------------------------------------------------------------------------------------------------------------------------------------------------------------------------------------------------------------------------------------------------------------------------------------------------------------------------------------------------------------------------------------------------------------------------------------------------------------------------------------------------------------------------------------------------------------------------------------------------------------------------------------------------------------------------------------------------------------------------------------------------------------------------------------------------------------------------------------------------------------------------------------------------------------------------------------------------------------------------------------------------------------------------------------------------------------------------------|

|                               |                                                                                                                                                                                                                                                                                                                                                                                                                                                                                                                                                                                                                                                                                                                                                                                                                                                                                                                                                                                                                                                                                    |
|-------------------------------|------------------------------------------------------------------------------------------------------------------------------------------------------------------------------------------------------------------------------------------------------------------------------------------------------------------------------------------------------------------------------------------------------------------------------------------------------------------------------------------------------------------------------------------------------------------------------------------------------------------------------------------------------------------------------------------------------------------------------------------------------------------------------------------------------------------------------------------------------------------------------------------------------------------------------------------------------------------------------------------------------------------------------------------------------------------------------------|
|                               | T201, T202, T210, T211, T212, T220, T221, T222, T230, T231, T232, T240, T241, T242, T244, T250, T252, T264, T266, T269, T273, T281, T282, T290, T292, T704, T742, T795, T796, T797, T801, T810, T811, T812, T813, T8157, T817, T8181, Z041, Z043, Z044, Z0450, Z0458, Z094, Z478, Z479                                                                                                                                                                                                                                                                                                                                                                                                                                                                                                                                                                                                                                                                                                                                                                                             |
| Neurological                  | F03, F050, F051, F058, F059, F063, F067, F068, F069, F072, F078, G08, G119, G20, G243, G248, G249, G252, G253, G258, G259, G3088, G309, G35, G4000, G4010, G4011, G4020, G4030, G4031, G4040, G4050, G4060, G4061, G4080, G4090, G4091, G410, G419, G450, G453, G454, G458, G459, G500, G510, G518, G519, G528, G529, G540 G541, G542, G543, G549, G560, G562, G563, G569, G570, G571, G573, G579, G588, G589, G608, G610, G618, G628, G629, G64, G700, G709, G728, G729, G809, G8190, G8191, G8199, G82093, G82223, G82293, G82490, G831, G8322, G838, G839, G900, G902, G903, G909, G92, G932, G934, G9380, G9388, G939, G958, G959, G961, G968, G969, G970, G971, G978, G979, G98, H490, H492, H512, H814, I630, I632, I633, I634, I635, I636, I638, I639, I64, I651, I652, I658, I659, I660, I662, I668, I669, I671, I676, I677, I678, I679, R200, R202, R203, R208, R251, R252, R253, R258, R260, R262, R263, R2682, R2688, R270, R278, R290, R298, R400, R401, R4029, R410, R413, R4180, R4188, R438, R470, R471, R478, , R54, R5601, R5602, R5609, R5680, R5688, R940, Z033 |
| Neurosurgical                 | G834, G910, G911, G912, G918, G919, G935, G936, G952, G9600, G9602, G9608, G9609, I600, I601, I602, I603, I604, I608, I609, I610, I611, I612, I613, I614, I615, I616, I618, I619, I620, I621, I629, R900, R930, S061, S0625, S064, S065, S066, S0685, S0686, S069, S090, S1412, S3438                                                                                                                                                                                                                                                                                                                                                                                                                                                                                                                                                                                                                                                                                                                                                                                              |
| Nutrition/<br>metabolic       | E41, E46, E500, E538, E616, E631, E639, E65, E662, E669, E671, E713, E722, E725, E739, E778, E789, E889, R633, R636, R638, R64, R630, Z713, E807                                                                                                                                                                                                                                                                                                                                                                                                                                                                                                                                                                                                                                                                                                                                                                                                                                                                                                                                   |
| Pain, headache                | G430, G431, G433, G438, G439, G440, G441, G442, G443, G444, G448, G501, M2550, M2551, M2552, M2553, M2554, M2555, M2556, M2557, M2558, M2559, M545, M546, M7960, M7961, R071, R072, R073, R074, R1010, R1011, R1012, R1019, R102, R1030, R1031, R1032, R1039, R104, R51, R520, R521, R522, R529, Z5180,                                                                                                                                                                                                                                                                                                                                                                                                                                                                                                                                                                                                                                                                                                                                                                            |
| Psychiatric/drugs/<br>alcohol | F09, F20, F200, F202, F208, F209, F220, F239, F252, F258, F259, F29, F300, F302, F309, F310, F311, F312, F313, F314, F318, F319, F321, F322, F323, F328, F329, F331, F332, F339, F341, F39, F402, F410, F411, F412, F418, F419, F429, F430, F432, F438, F439, F445, F448, F449, F453, F458, F459, F480, F489, F509, F602, F603, F608, F609, F69, F801, F845, F919, F929, F985, F99, R440, R441, R442, R443, R448, R450, R451, R452, R453, R454, R455, R456, R457, R458, R461, R462, R4688, Z004, Z711, Z728, Z730, Z733, Z738, Z739, Z765, Z659, F100, F101, F102, F103, F104, F109, F110, F111, F112, F113, F114, F120, F121, F130, F133, F135, F141, F145, F151, F189, F190, F191, F192, F193, R784, R788, R789, T407, T510, Z502, Z721                                                                                                                                                                                                                                                                                                                                          |
| Pulmonary                     | I270, I272, I279, I288, I289, J209, J219, J392, J398, J399, J40, J42, J438, J439, J440, J441, J448, J449, J4500, J4501, J4510, J4590, J4591, J47, J61, J6799, J680, J683, J688, J690, J698, J700, J702, J704, J708, J80, J82, J841, J848, J849, J850, J860, J869, J90, J930, J931, J938, J939, J942, J948, J9580, J9581, J959, J9600, J9601 J9609, J9610, J9611, J9619, J9690, J9691, J9699, J980, J9810, J9818, J982, J984, J985, J988, J989, , R048, R05, R060, R061, R062, R064, R068, R090, R091, R845, R91, R942, T179, T71, Z111                                                                                                                                                                                                                                                                                                                                                                                                                                                                                                                                             |
| Optomological                 | B309, H000, H001, H01, H010, H011, H019, H020, H024, H026, H028, H029, H041, H043, H045, H049, H050, H051, H052, H058, H059, H100, H101, H102, H103, H104, H105, H108, H109, H110, H111, H113, H114, H150, H151, H158, H159, H160, H162, H163, H168, H169, H182, H188, H189, H200, H209, H210, H262, H269, H309, H330, H332, H333, H335, H341, H342, H348, H354, H356, H358, H359, H400, H402, H405, H408, H409, H430, H431, H433, H438, H440, H441, H46, H470, H471, H501, H509, H519, H531, H532, H534, H538, H539, H540, H544, H549, H571, H578, H579, H5988, H599, S001, S002, S0110, S050, S051, S055, S058, S059, T150, T151, T158, T159                                                                                                                                                                                                                                                                                                                                                                                                                                     |
| Sleep                         | F510, G470, G472, G4730, G4738, G474, G478, G479                                                                                                                                                                                                                                                                                                                                                                                                                                                                                                                                                                                                                                                                                                                                                                                                                                                                                                                                                                                                                                   |
| Thrombosis                    | I260, I269, I513, I740, I741, I742, I743, I744, I745, I748, I749, I800, I801, I802, I803, I808, I809, I81, I820, I822, I823, I828, I829, T800                                                                                                                                                                                                                                                                                                                                                                                                                                                                                                                                                                                                                                                                                                                                                                                                                                                                                                                                      |
| Vascular                      | I710, I711, I712, I713, I714, I718, I719, I720, I724, I728, I770, I771, I772, I701, I7020, I7021, I708, I709, I730, I738, I739, I776, I779, I788, I830, I831, I832, I838, I839, I868, I871, I872, I878, I879, I880, I888, I889, I890, I891, I898, I972, I978, I979, I99, M310, M311, M313, M314, M315, M316, M329, M331, M349, M352, M353, M358, R600, R601, R609                                                                                                                                                                                                                                                                                                                                                                                                                                                                                                                                                                                                                                                                                                                  |
| Volume depletion              | E860, E868, I950, I951, I958, I959, R571, R578, R579, R58, R031                                                                                                                                                                                                                                                                                                                                                                                                                                                                                                                                                                                                                                                                                                                                                                                                                                                                                                                                                                                                                    |
| Weakness, social<br>issues    | R296, R42, R464, R53, R631, R634, R682, R688, Z540, Z541, Z542, Z544, Z548, Z549, Z593, Z598, Z608, Z609, Z630, Z632, Z637, Z638, Z740, Z741, Z742, Z748, Z749, Z751, Z755, Z758, Z515                                                                                                                                                                                                                                                                                                                                                                                                                                                                                                                                                                                                                                                                                                                                                                                                                                                                                             |

**Table 2: ICD-O Codes to classify cancer type**

| Cancer type                              | ICD-O Code(s)                                                  |
|------------------------------------------|----------------------------------------------------------------|
| Head and neck                            | C00.* – C08.*, C09.* – C15.*, C30.* – C32.*, C37.*, C73.*      |
| Gastrointestinal                         | C16.*, C17.*, C18.0 – C18.9, C19.9, C20.9, C21.*, C22.*-C26.*, |
| Lung                                     | C33.*, C34.*                                                   |
| Breast                                   | C50.*                                                          |
| Gynecological                            | C51.*- C58.*                                                   |
| Male genital                             | C60.*- C63.*                                                   |
| Genitourinary                            | C64.* - C68.*                                                  |
| Neurological                             | C47.*, C70.*-C72.*                                             |
| Melanoma (“skin”)                        | C44.*                                                          |
| Hematological                            | C42.*, C77.*                                                   |
| Endocrine                                | C74.*, C75.*                                                   |
| Bone, soft tissue                        | C40.*, C41.*, C49.*                                            |
| Other                                    |                                                                |
| • Heart, mediastinum, pleura             | • C38.*                                                        |
| • Other respiratory/intrathoracic organs | • C39.*                                                        |
| • Retroperitoneum and peritoneum         | • C48.*                                                        |
| • Eye                                    | • C69.*                                                        |
| • Other ill defined                      | • C76.*                                                        |
| • Unknown primary                        | • C80.*                                                        |

**Table 3: Palliative care codes and databases**

| Database                                                     | Codes                                                                                                                                                                                                                                                                                                                                                                                                                                                                                                                                                                                                                                                                                                                                                                                                                                                                                                                                                                                                                                                                                                                                                                                                      |
|--------------------------------------------------------------|------------------------------------------------------------------------------------------------------------------------------------------------------------------------------------------------------------------------------------------------------------------------------------------------------------------------------------------------------------------------------------------------------------------------------------------------------------------------------------------------------------------------------------------------------------------------------------------------------------------------------------------------------------------------------------------------------------------------------------------------------------------------------------------------------------------------------------------------------------------------------------------------------------------------------------------------------------------------------------------------------------------------------------------------------------------------------------------------------------------------------------------------------------------------------------------------------------|
| CCC (complex continuing care)                                | P1AO (hospice care) = 1<br>J5C (end stage disease, < 6 mos to live) = 1                                                                                                                                                                                                                                                                                                                                                                                                                                                                                                                                                                                                                                                                                                                                                                                                                                                                                                                                                                                                                                                                                                                                    |
| CCRS-LTC (long term care)                                    | P1AO (hospice care) = 1<br>J5C (end stage disease, < 6 mos to live) = 1                                                                                                                                                                                                                                                                                                                                                                                                                                                                                                                                                                                                                                                                                                                                                                                                                                                                                                                                                                                                                                                                                                                                    |
| DAD (hospitalizations)                                       | DX10CODE1 (main diagnosis) = Z515 (palliative care)<br>INSERV (intervention provider service) = 00121 (palliative med)<br>PRVSERV (provider service) = 00121 (palliative med)                                                                                                                                                                                                                                                                                                                                                                                                                                                                                                                                                                                                                                                                                                                                                                                                                                                                                                                                                                                                                              |
| HCD-OACCAC (homecare)                                        | SERVICE_RPC (service recipient)= 54 (complex end of life), 95 (end of life, home)<br>RESID_TYPE = 2000 (hospice, palliative care unit)<br>SRC_ADMISSION (service goals) = 95 (end of life, home)<br>SRC_DISCH (service goals) = 95 (end of life, home)                                                                                                                                                                                                                                                                                                                                                                                                                                                                                                                                                                                                                                                                                                                                                                                                                                                                                                                                                     |
| OHIP (physician billings)                                    | Feecode =<br>A900 (COMPLEX HOUSE CALL ASSESSMENT), A901 (GENERAL/FAMILY PRACTICE-HOUSECALL ASSESSMENT), A945 (GEN./FAM.PRACT.SPECIAL PALLIATIVE CARE CONSULTATION), B960-B964 (TRAVEL PREMIUM - SPECIAL VISIT TO PATIENT'S HOME), B966 (TRAVEL PREMIUM - PALLIATIVE CARE HOME VISIT), B986-B988 (GERIATRIC HOME VISIT SPECIAL VISIT PREMIUM), B990 (SPEC VIS TO PT'S HOME, WK/DAYTIME), B992 (SPEC VIS-PT'S HOME/NON-ELECT -SAC OFF HRS. WK/DAYTIME), B993 (EMERGENCY CALL WITH SACRIFICE OF OFFICE HOURS), B994 (SPEC VIS TO PT'S HOME/NON-ELECT., EVE) , B996 (SPECIAL VISIT-HOME-NIGHTS(12MN-7AM) 1ST PT.), B997 (SPEC VIS TO PT'S HOME OR EQUI), B998 (SPEC VIS PALLIATIVE CARE HOME, DAYS, EVE), C882 (TERMINAL CARE IN HOSP.G.P/F.P), C945 (SPECIAL PALLIATIVE CARE CONSULT HOSP IN PATIENT), C982 (PALLIATIVE CARE), G511 (TELEPHONE MANAGEMENT OF PALLIATIVE CARE AT HOME), G512 (PALLIATIVE CARE CASE MANAGEMENT FEE THE SERVICE RENDERED), K023 (PALLIAT CARE SUPPORT INDIVID CARE 1/2 HR OR MAJOR PART), K700 (PALLIATIVE CARE OUT-PATIENT CASE CONFERENCE), W872 (TERMINAL CARE N.H G.P/FAMILY PRACTICE), W882 (TERMINAL CARE IN CHR.HOSP.G.P), W972 (PALLIATIVE CARE), W982 (PALLIATIVE CARE) |
| NACRS (ED visits)                                            | PRVSERV (provider service) = 00121 (palliative med)<br>CONSULTSERV (consulting service) = 00121 (palliative med)                                                                                                                                                                                                                                                                                                                                                                                                                                                                                                                                                                                                                                                                                                                                                                                                                                                                                                                                                                                                                                                                                           |
| RAI-CA (Resident Assessment Instrument – Contact Assessment) | B2C (referral to initial or continue palliative services) = 1<br>B4(expected residential status during services) = 12 (hospice/palliative care unit)<br>E7 (client group) = 2 (end of life)                                                                                                                                                                                                                                                                                                                                                                                                                                                                                                                                                                                                                                                                                                                                                                                                                                                                                                                                                                                                                |
| RAI-HC (Resident Assessment Instrument – Home Care source)   | CC3F (goals of care – palliative care) = 1<br>K8E (prognosis of < 6 mos to live) = 1<br>P2S (hospice care) = 1, 2                                                                                                                                                                                                                                                                                                                                                                                                                                                                                                                                                                                                                                                                                                                                                                                                                                                                                                                                                                                                                                                                                          |
